## Correction: Lung cancer susceptibility from *GSTM1* deletion and air pollution with smoking status: a meta-prediction of worldwide populations

Pojui Yu<sup>1,2</sup>, Joyce D. Kusuma<sup>3</sup>, Maria Aurora R. Suarez<sup>4</sup> and Shyang-Yun Pamela Koong Shiao<sup>5</sup>

<sup>1</sup> Department of Nursing, Fu Jen Catholic University Hospital, New Taipei City, Taiwan (R.O.C.)

<sup>2</sup> School of Nursing, College of Medicine, National Taiwan University, Taipei, Taiwan (R.O.C.)

<sup>3</sup> Heritage Victor Valley Medical Group, Big Bear Lake, CA, USA

<sup>4</sup> Department of Critical Care and Telemetry, Citrus Valley Health Partners, West Covina, CA, USA

<sup>5</sup> College of Nursing and Medical College of Georgia, Augusta University, Augusta, GA, USA

**Published:** November 16, 2018

**Copyright:** Yu et al. This is an open-access article distributed under the terms of the Creative Commons Attribution License 3.0 (CC BY 3.0), which permits unrestricted use, distribution, and reproduction in any medium, provided the original author and source are credited.

**This article has been corrected:** The correct affiliations information is given below:

<sup>3</sup> Heritage Victor Valley Medical Group, Big Bear Lake, CA, USA

<sup>4</sup> Department of Critical Care and Telemetry, Citrus Valley Health Partners, West Covina, CA, USA

Original article: Oncotarget. 2018; 9:31120-31132. <https://doi.org/10.18632/oncotarget.25693>
